# Supplementary material for: Structural determinations and magnetic properties of a “chiral at metal” complex and its resulting [Cu–Ln]2 compounds
Source: Royal Society of Chemistry journal article supplement (doi:10.1039/d1dt04249a), 2022-01-01
Supplement: d1dt04249a1.pdf [file d1dt04249a1.pdf]

## Supplementary Information

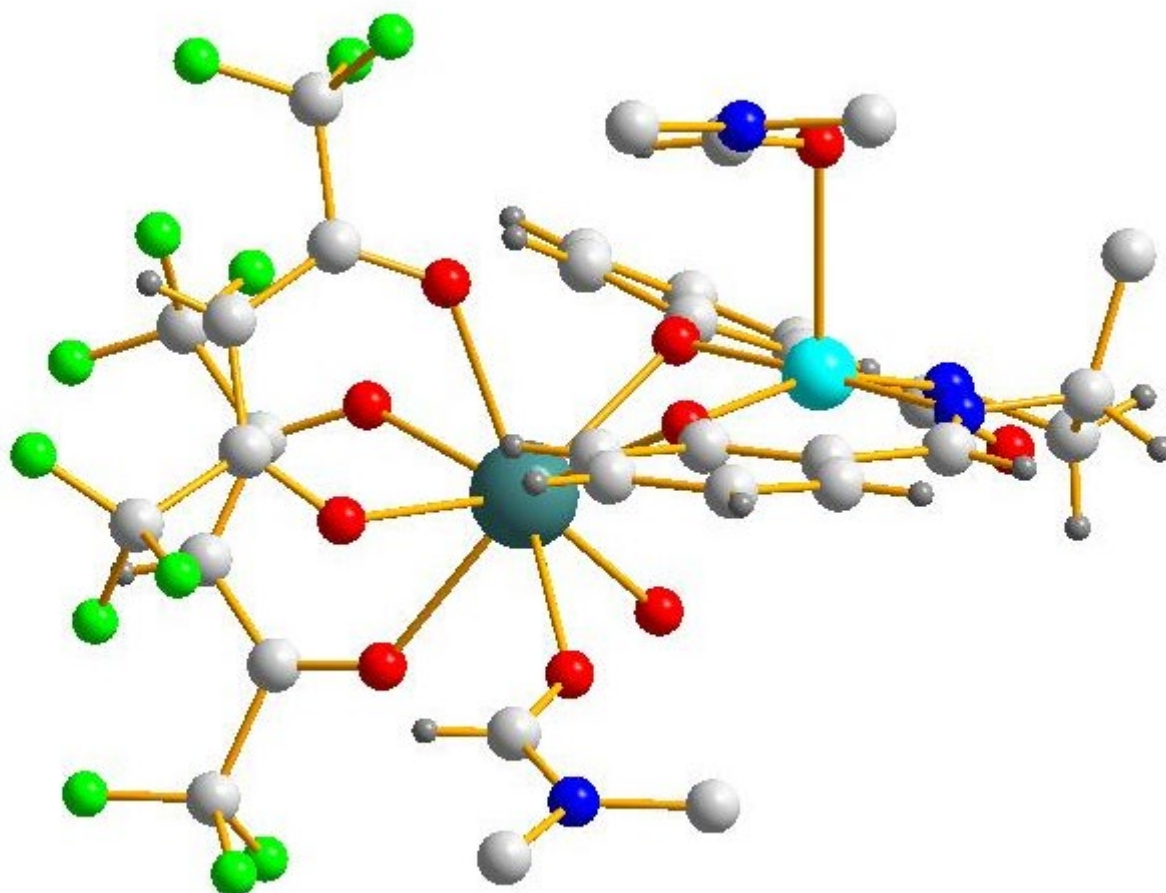

Figure S1. Diamond view of the asymmetric unit of complex 7.

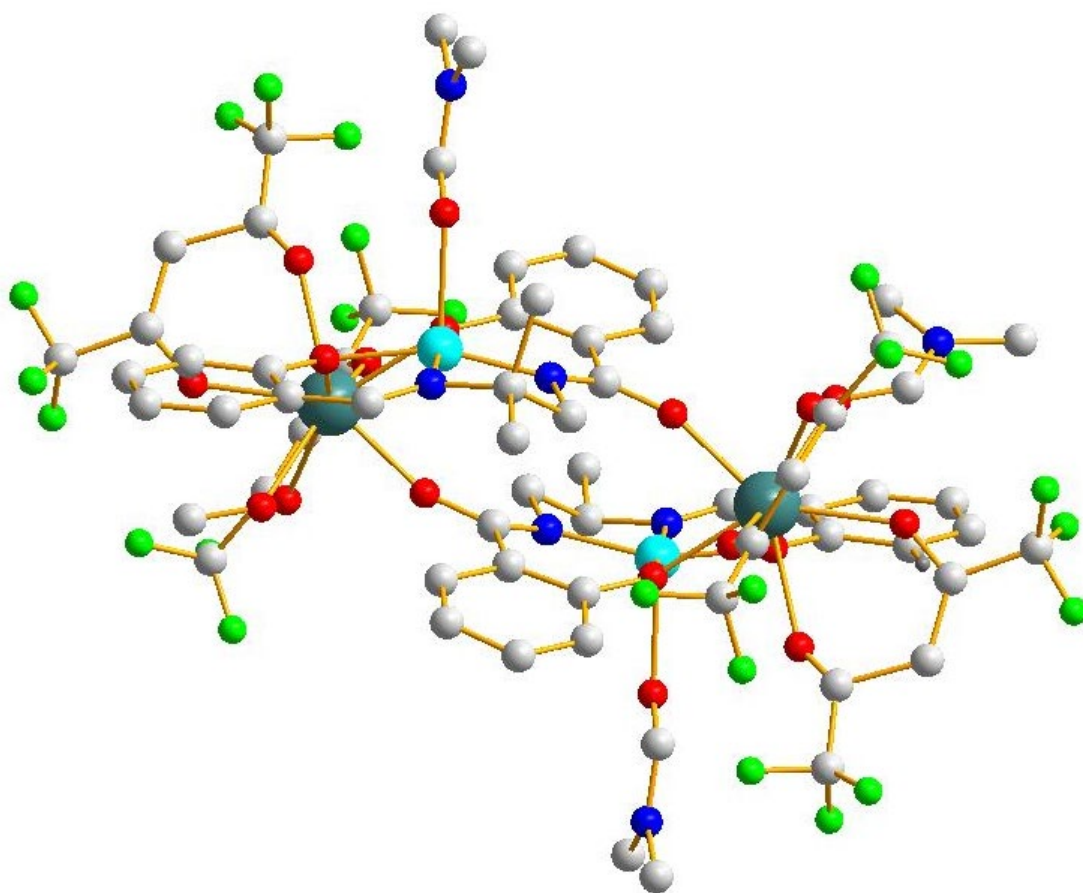

Figure S2. Diamond view of the tetranuclear complex **5**. H atoms are omitted for clarity.

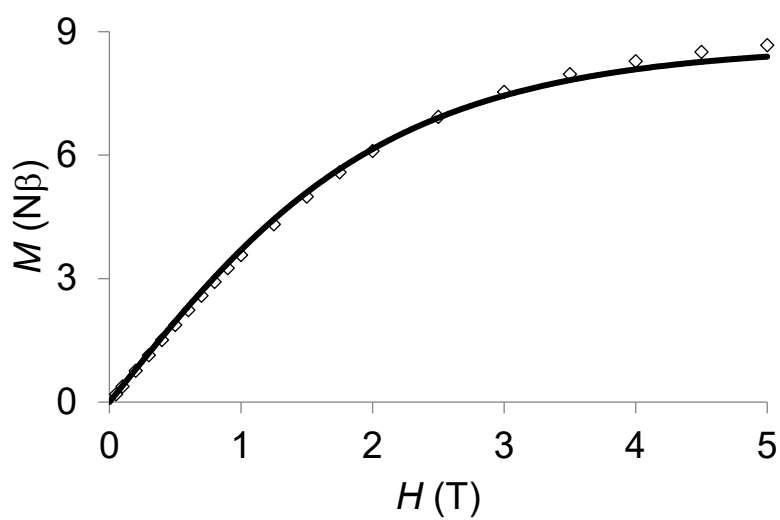

Figure S3. Field dependence of the magnetization for **3** at 2 K with an approximate model using a set of eight Cu ions.

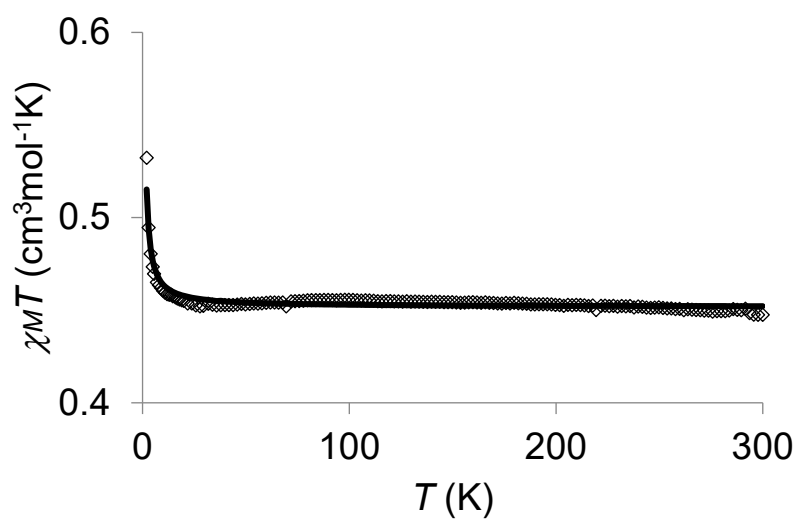

Figure S4. Temperature dependence of the  $\chi_M T$  product for complex **1** at 0.1 T applied magnetic field. The solid line corresponds to the best data fit (see text).

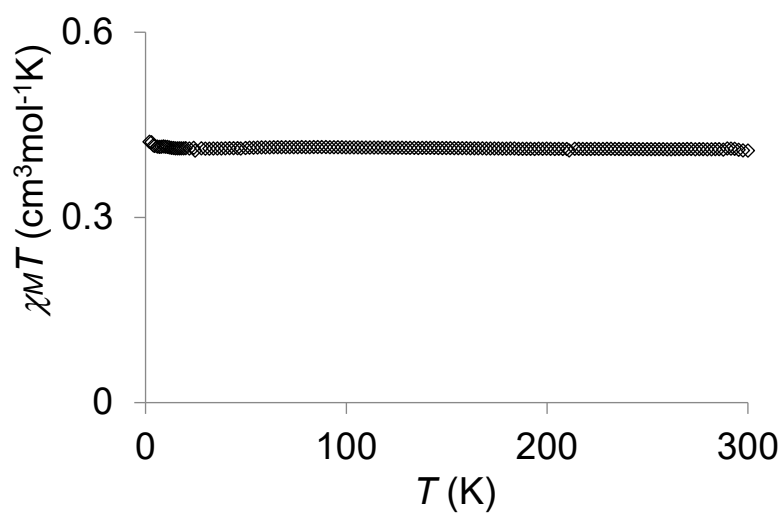

Figure S5. Temperature dependence of the  $\chi_M T$  product for complex **2** at 0.1 T applied magnetic field. The solid line corresponds to the best data fit (see text).

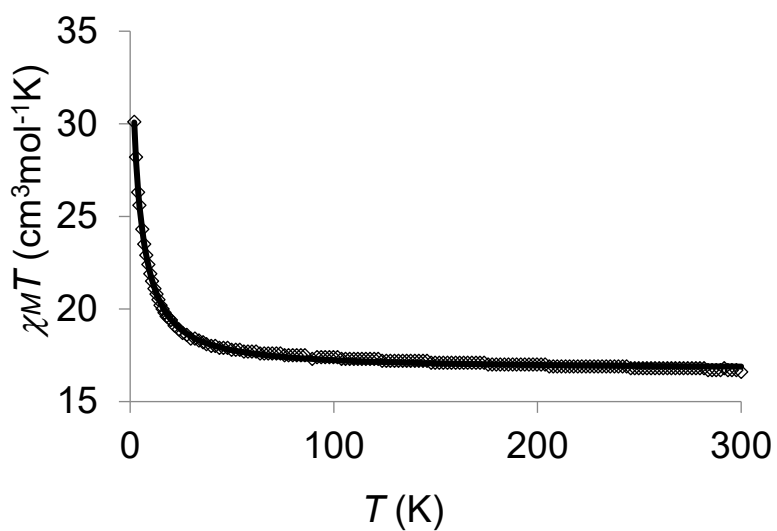

Figure S6. Temperature dependence of the  $\chi_M T$  product for complex **4** at 0.1 T applied magnetic field. The solid line corresponds to the best data fit (see text).

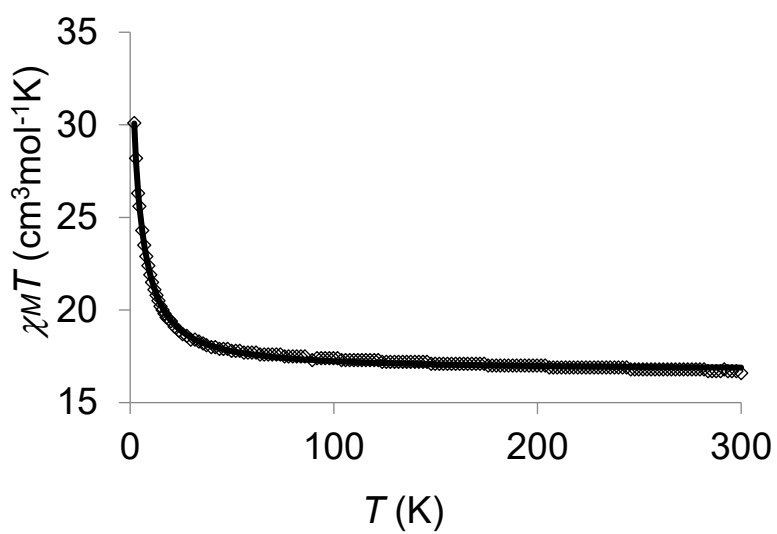

Figure S7. Temperature dependence of the  $\chi_M T$  product for complex **9** at 0.1 T applied magnetic field. The solid line corresponds to the best data fit (see text).

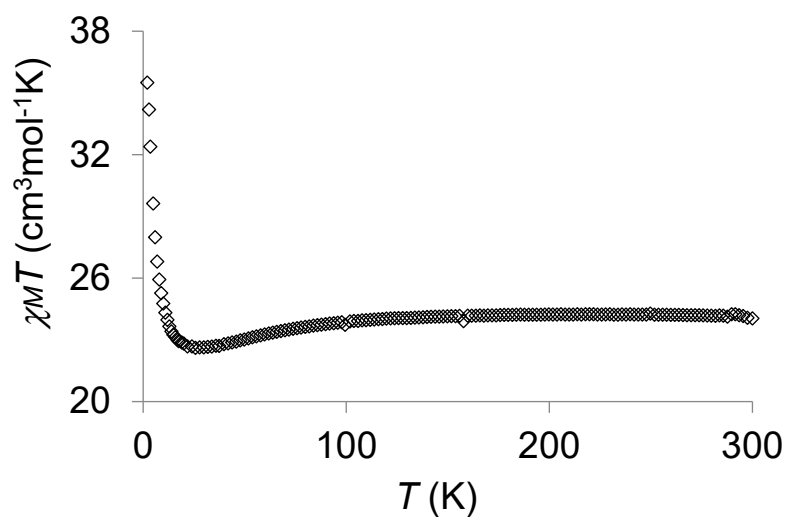

Figure S8. Temperature dependence of the  $\chi_M T$  product for complex **5** at 0.1 T applied magnetic field. The solid line corresponds to the best data fit (see text).

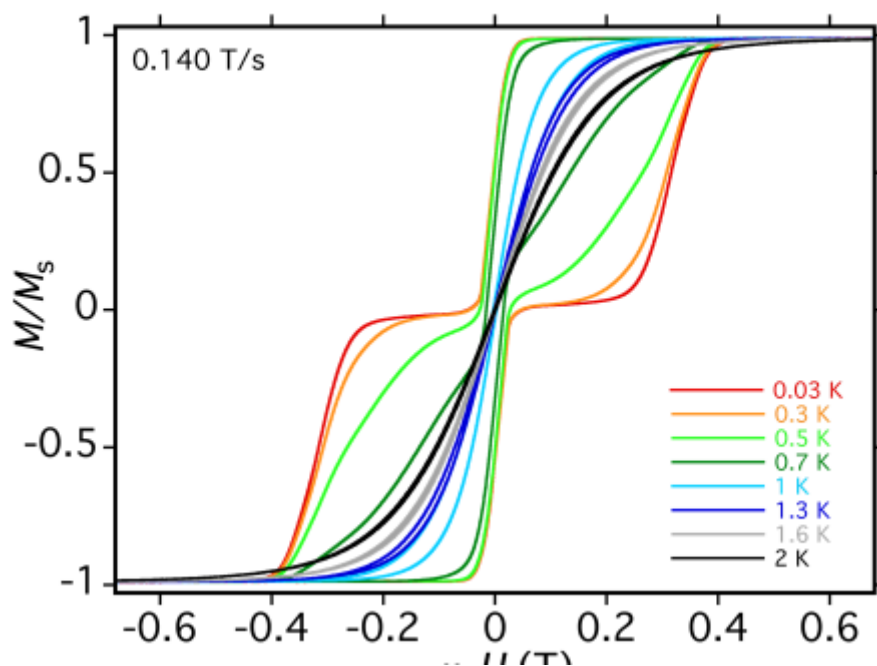

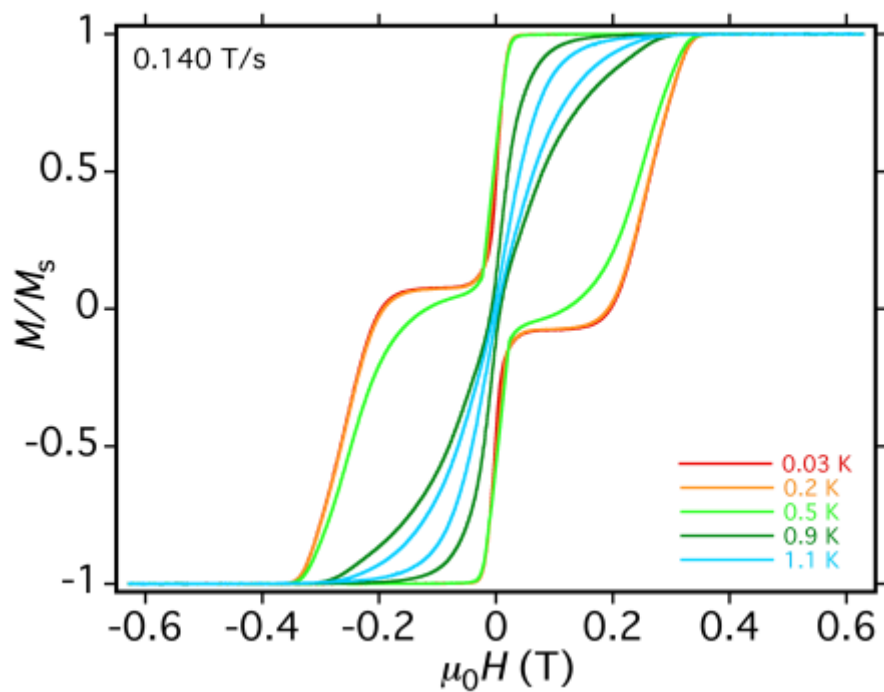

Figure S9. Single-crystal magnetization ( $M$ ) vs. applied field measurements ( $\mu_0H$ ) for complexes **8** (up) and **6** (down) at several temperatures and 0.14 T/s (top), and at 0.04 K for several field sweep rates (bottom).  $M$  is normalized to its saturation value at 1.4 T.
